# Supplementary material for: AI-based histologic scoring enables automated and reproducible assessment of enrollment criteria and endpoints in NASH clinical trials
Source: PubMed Central journal article supplement — medRxiv. 2023 Apr 25:2023.04.20.23288534. Preprint. [Version 1] doi: 10.1101/2023.04.20.23288534 (PMC10168404; doi:10.1101/2023.04.20.23288534), 2023-04-25

**Supplementary Table 1. Model development and test dataset characteristics.**

| Dataset                       | Trial phase | Number of WSIs (H&E, MT) | Drug class                                                 | Enrollment criteria                                                                                |
|-------------------------------|-------------|--------------------------|------------------------------------------------------------|----------------------------------------------------------------------------------------------------|
| Model development datasets    |             |                          |                                                            |                                                                                                    |
| 1                             | 3           | 2188, 2188               | ASK1 inhibitor                                             | NASH diagnosis; fibrosis F3 <sup>23</sup>                                                          |
| 2                             | 3           | 2488, 2478               | ASK1 inhibitor                                             | NASH diagnosis; fibrosis F4 <sup>23</sup>                                                          |
| 3                             | 2b          | 528, 528                 | Monoclonal antibody directed against LOXL2                 | NASH defined as steatosis > 5% with associated lobular inflammation: Ishak stage 3,4 <sup>47</sup> |
| 4                             | 2b          | 561, 554                 | Monoclonal antibody directed against LOXL2                 | NASH diagnosis; Ishak stage 5,6 <sup>21</sup>                                                      |
| 5                             | 2           | 158, 163                 | ASK1 Inhibitor, monoclonal antibody directed against LOXL2 | Evidence of NASH with fibrosis on biopsy <sup>48</sup>                                             |
| 6                             | 2           | 312, 312                 | PPAR $\delta$ agonist                                      | Definite NASH; NAS $\geq$ 4 with 1 per component; fibrosis F1, F2, F3 <sup>49</sup>                |
| 7                             | 3           | 1477, 766                | Nucleotide analogue (antiviral)                            | HBV <sup>50</sup>                                                                                  |
| 8                             | 3           | 851, 415                 | Nucleotide analogue (antiviral)                            | HBV <sup>50</sup>                                                                                  |
| 9                             | 2b          | 331, 333                 | Monoclonal antibody directed against LOXL2                 | PSC <sup>24</sup>                                                                                  |
| Analytic performance test set |             |                          |                                                            |                                                                                                    |
| 10                            | 2b          | 639, 633                 | Insulin sensitizer                                         | Definite NASH; NAS $\geq$ 4 with 1 per component; Fibrosis F1, F2, F3 <sup>22</sup>                |

ASK1, apoptosis signal-regulating kinase 1 (also known as mitogen-activated protein kinase kinase kinase 5); F, fibrosis stage; HBV, hepatitis B virus; H&E, hematoxylin and eosin; LOXL2, lysyl oxidase-like 2; MT, Masson's trichrome; NAS, NAFLD activity score; NASH, nonalcoholic steatohepatitis; PPAR $\delta$ , peroxisome proliferator activated receptor delta; PSC, primary sclerosing cholangitis; WSI, whole slide image.

**Supplementary Table 2. Algorithm repeatability assessment using 10 independent reads per WSI.**

|                      | <b>Number of WSIs</b> | <b>Model versus model agreement rate</b> |
|----------------------|-----------------------|------------------------------------------|
| Steatosis            | 639                   | 100%                                     |
| Lobular inflammation | 639                   | 100%                                     |
| Ballooning           | 639                   | 100%                                     |
| Fibrosis             | 633                   | 100%                                     |

WSI, whole slide image.

**Supplementary Table 3. Correlations between the AI-derived continuous scoring system and comparable noninvasive tests.**

| Continuous scoring system             | NIT                                    | Kendall's Tau | P value  | n   |
|---------------------------------------|----------------------------------------|---------------|----------|-----|
| Continuous fibrosis stage             | FibroScan                              | 0.33          | 2.49E-11 | 188 |
| Continuous fibrosis stage             | FIB4                                   | 0.23          | 1.56E-06 | 207 |
| Continuous fibrosis stage             | ELF                                    | 0.22          | 2.52E-06 | 210 |
| Continuous fibrosis stage             | TIMP1                                  | 0.11          | 2.01E-02 | 210 |
| Continuous fibrosis stage             | PIIINP                                 | 0.14          | 3.03E-03 | 210 |
| Continuous fibrosis stage             | MRI-PDFF                               | -0.11         | 2.36E-01 | 59  |
| Continuous fibrosis stage             | Morphometric quantitative collagen (%) | 0.56          | 2.20E-32 | 205 |
| Continuous steatosis grade            | MRI-PDFF                               | 0.52          | 4.83E-09 | 59  |
| Continuous steatosis grade            | Morphometric quantitative collagen (%) | -0.16         | 5.42E-04 | 205 |
| Continuous lobular inflammation grade | C-reactive protein                     | 0.13          | 5.04E-03 | 211 |
| Continuous lobular inflammation grade | Adiponectin                            | -0.15         | 1.38E-03 | 211 |
| Continuous ballooning grade           | HbA1C                                  | 0.16          | 8.36E-04 | 211 |

AI, artificial intelligence; ELF, enhanced liver fibrosis test; FIB4, fibrosis-4; HbA1C, hemoglobin A1c; MRI-PDFF, magnetic resonance imaging derived proton density fat fraction; NIT, noninvasive test; PIIINP, procollagen III N-terminal peptide; Kendall's Tau, Kendall's rank correlation coefficient for ordinal scores; TIMP, tissue inhibitor of metalloproteinase; TIMP1, TIMP metalloproteinase inhibitor 1.

**Supplementary Table 4. Example instructions for the interpretation of histologic features.**

| <b>Histologic feature</b>       | <b>Example instructions</b>                                                                                                                                                                            |
|---------------------------------|--------------------------------------------------------------------------------------------------------------------------------------------------------------------------------------------------------|
| Lobular inflammation            | Place label regions containing at least three inflammatory cells, not including those within sinusoids. Do not label regions of portal inflammation with this region label.                            |
| Hepatocyte ballooning           | Please use this label on regions of hepatocellular ballooning. Hepatocellular ballooning is defined as round cells with rarified cytoplasm that are at least 50% larger than neighboring normal cells. |
| Steatosis                       | Please use this label on regions of dense steatosis.                                                                                                                                                   |
| Thick pathologic fibrotic septa | Please use this label for thickened fibrotic septae extending from portal and central regions considered when staging liver biopsies.                                                                  |
| Portal tract (normal)           | Please use this label for normal-appearing, small-/medium-sized portal regions, not expanded by fibrosis or inflammation.                                                                              |
| Portal tract (abnormal)         | Please use this label for portal regions expanded by inflammation, fibrosis, bile ductular proliferation, or any combination of the above.                                                             |
| Large normal septa              | Please use this label for larger intrahepatic normal septae (usually containing larger arteries, veins, and bile ducts) that would not be included when staging liver biopsies.                        |
| Subcapsular fibrosis            | Please use this label for normal subcapsular regions of fibrosis not considered when staging liver biopsies.                                                                                           |

**Supplementary Table 5. AI-derived models, input substances, and objectives for application.**

| Model name            | Major input substances                                                                                                                                                                                                                             | Objectives                                                                                                                                 |
|-----------------------|----------------------------------------------------------------------------------------------------------------------------------------------------------------------------------------------------------------------------------------------------|--------------------------------------------------------------------------------------------------------------------------------------------|
| Artifact model        | Background, blur artifact, bad stain artifact, black spots, bubble, cautery, crushed tissue, hair, margin ink, marker tape, skin cell, tissue fold, rainbow pattern artifact                                                                       | Remove unwanted regions of WSI that should be excluded from downstream analysis                                                            |
| MT tissue model       | Lumen, blood vessel, bile duct, cirrhotic septal portal fibrosis, hilar fibrosis, large septal area, perisinusoidal fibrosis, septal fibrosis, subcapsular fibrosis, thick fibrotic septae, normal portal area, normal portal triad, fibrosis      | Detect fibrosis regions to identify and quantify features of interest                                                                      |
| MT large septae model | Normal portal area, normal portal triad, perisinusoidal fibrosis, thick fibrotic septae                                                                                                                                                            | Detect regions of pathological fibrosis                                                                                                    |
| H&E tissue model      | Lobular Inflammation, portal inflammation, interface hepatitis, bile duct, blood vessel, Normal hepatocytes, hepatocellular swelling, hepatocellular ballooning, steatosis, microvesicular steatosis                                               | Detect macrovesicular steatosis, hepatocellular ballooning, and lobular inflammation regions to identify and quantify features of interest |
| H&E GNN model         | <i>Overlays from H&amp;E tissue model:</i><br>Lobular inflammation, portal inflammation, interface hepatitis, bile duct, blood vessel, normal hepatocytes, hepatocellular swelling, hepatocellular ballooning, steatosis, microvesicular steatosis | Compute slide-level NASH CRN ordinal grades                                                                                                |
| MT GNN model          | <i>Overlays from MT large septae model:</i><br>Large septae, pathological fibrosis, other tissue<br><br><i>Overlays from MT tissue model:</i><br>Fibrosis, bile duct, blood vessel, other tissue                                                   | Compute slide-level NASH CRN ordinal stage                                                                                                 |

AI, artificial intelligence; CRN, Clinical Research Network; GNN, graph neural network; H&E, hematoxylin and eosin; MT, Masson's trichrome; NAS, nonalcoholic fatty liver disease activity score; NASH, nonalcoholic steatohepatitis; WSI, whole slide image.

**Supplementary Fig. 1. Model training schematic.**

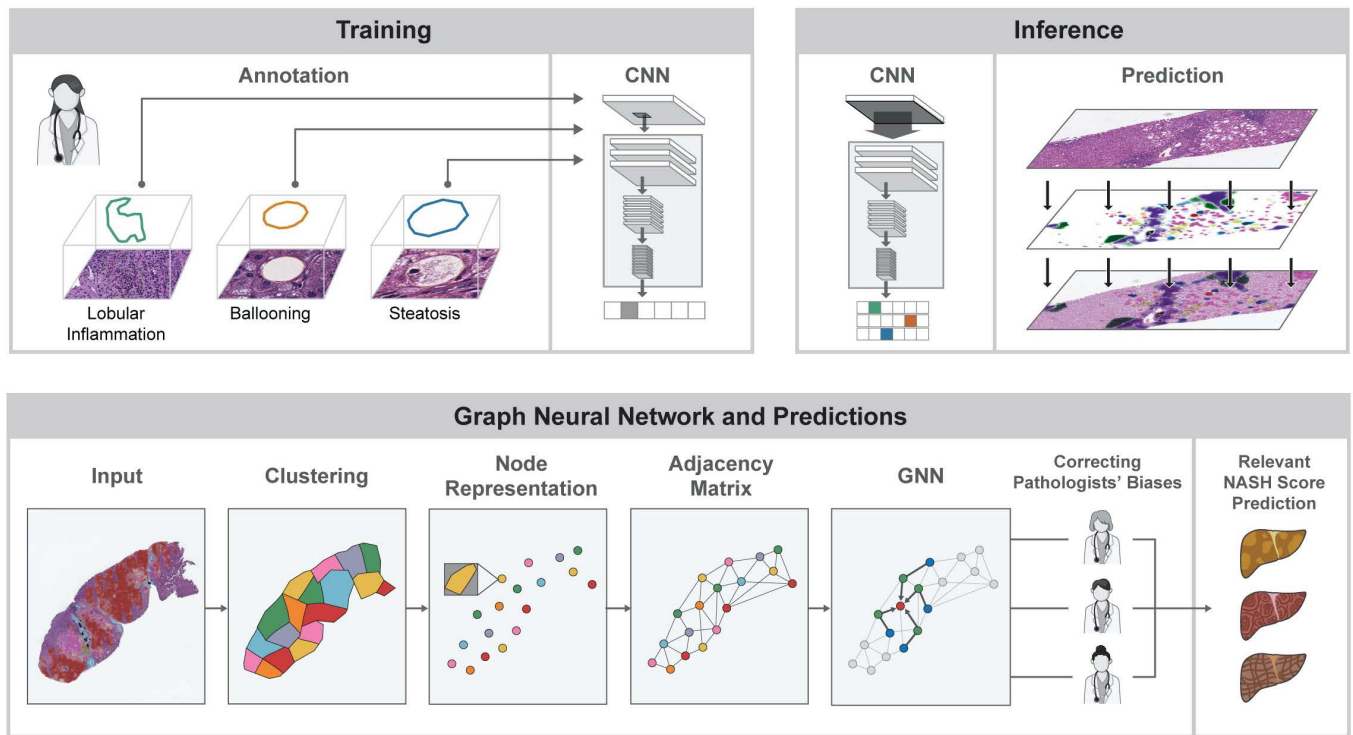

CNN, convolutional neural network; GNN, graph neural network; NASH, nonalcoholic steatohepatitis.



**Supplementary Fig. 2. Segmentation model development process.**

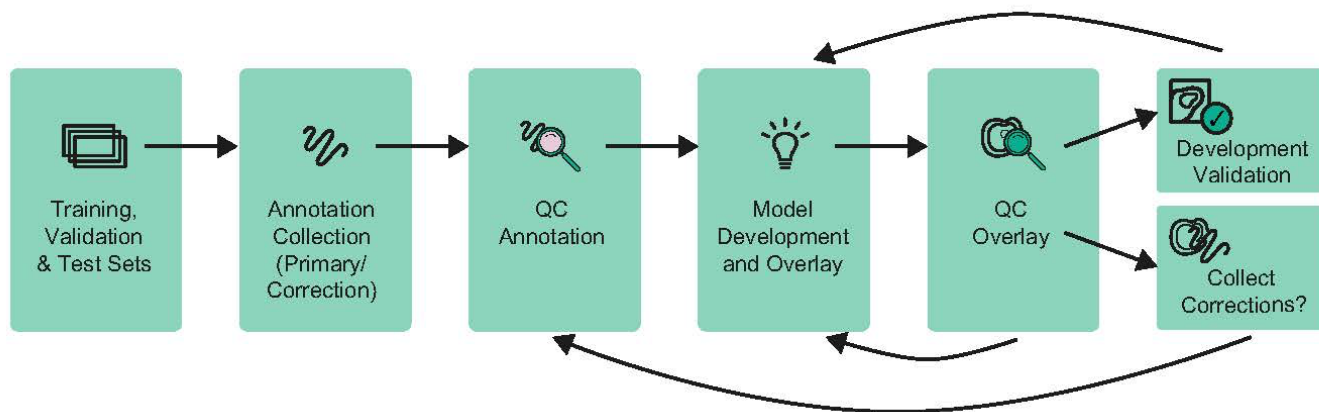

QC, quality control.

**Supplementary Fig. 3. Mapping of continuous scores.**

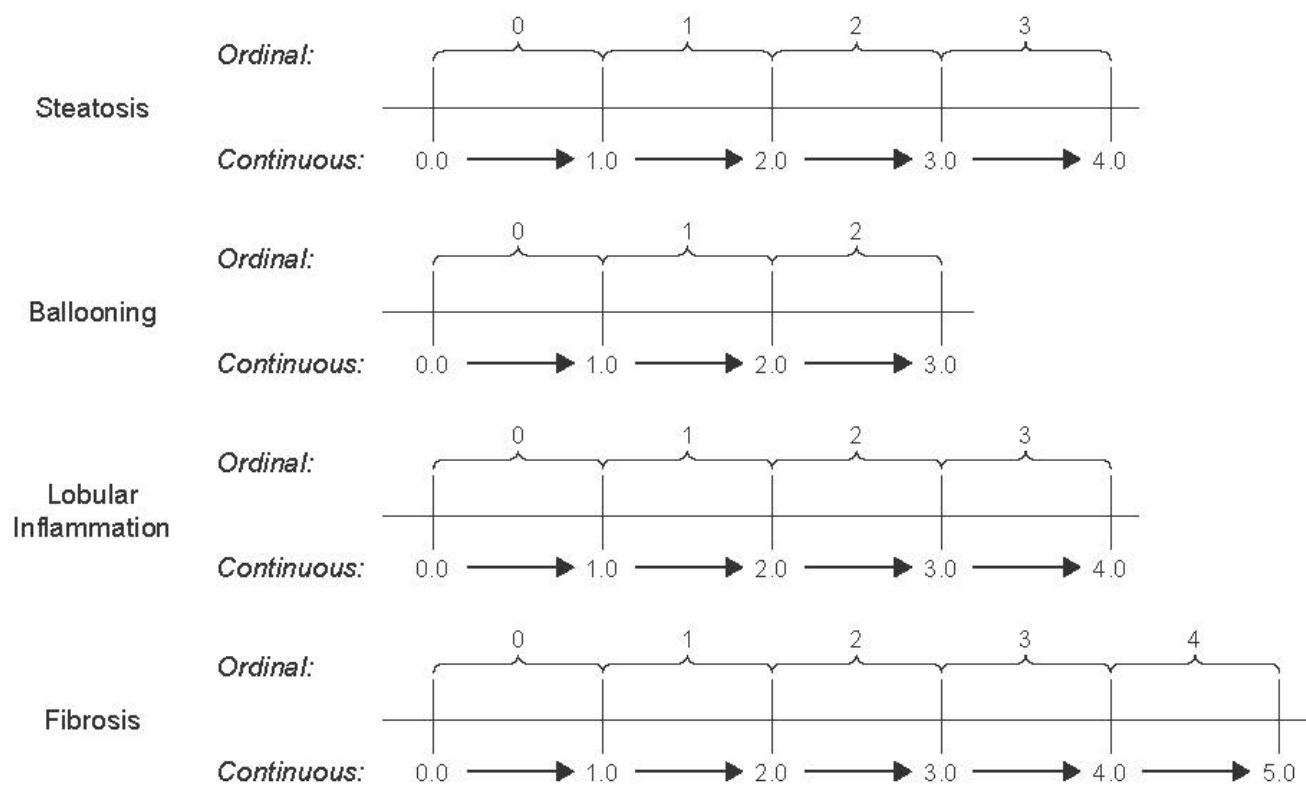

Supplement: NIHPP2023.04.20.23288534v1-supplement-1.pdf [file NIHPP2023.04.20.23288534v1-supplement-1.pdf]
